# Supplementary material
Source: HighWire-hosted journal article supplement (https://www.annfammed.org/highwire/filestream/8967/field_highwire_adjunct_files/0/Burt_Supp_Figure_Table.pdf)
Supplement: Burt_Supp_Figure_Table.pdf [file Burt_Supp_Figure_Table.pdf]

**SUPPLEMENTAL MATERIALS FOR**

Burt J, Abel G, Elliott MN, et al. the evaluation of physicians' communication skills from multiple perspectives. *Ann Fam Med*. 2018;16(4):330-337.

**Appendix Figure 1** – Flow chart outlining recruitment and sample derivation.

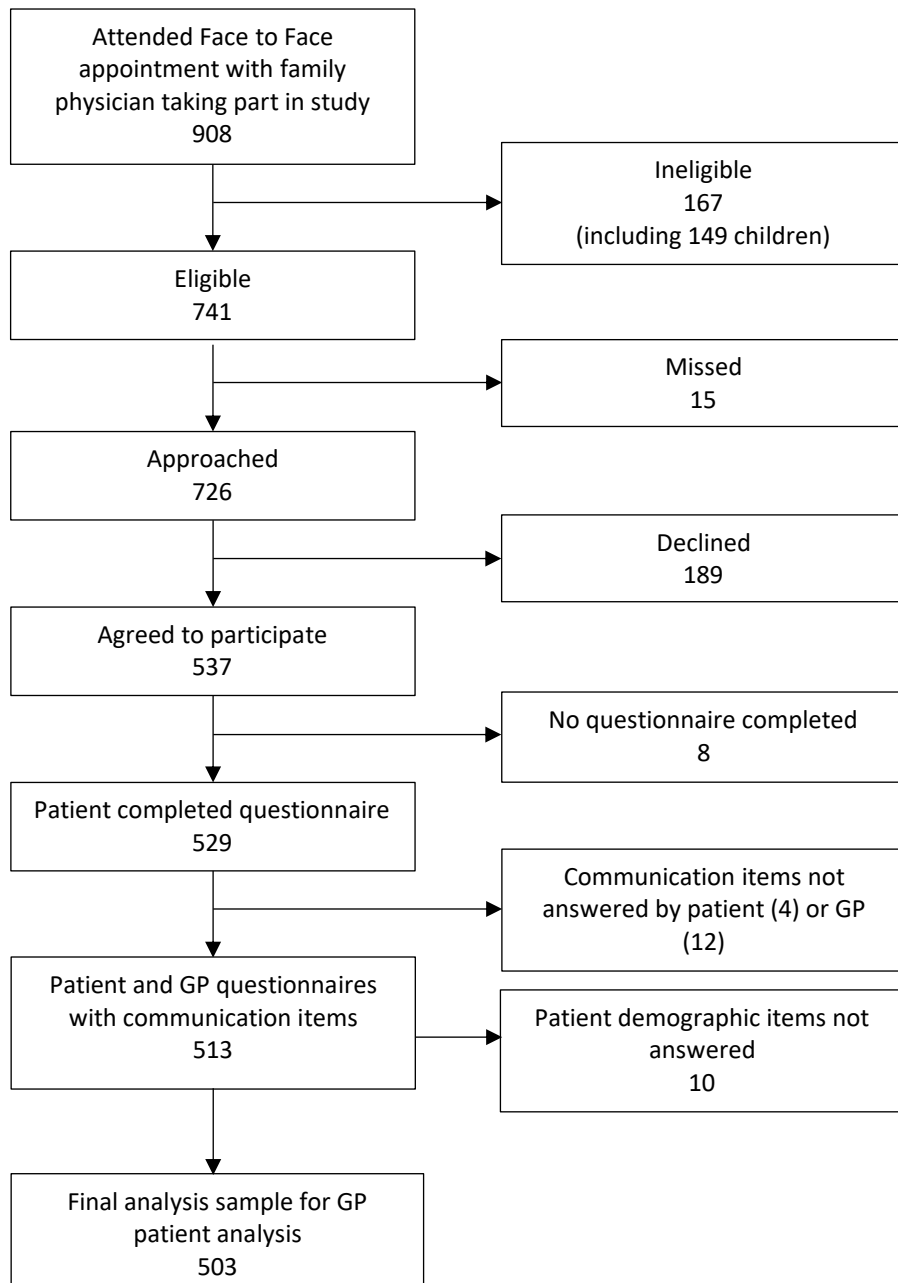

**Appendix Table 1** – Pairwise Spearman correlation coefficients between the four rater’s sets of scores for the 55 consultations included in the sub-sample analysis using these scores ( $p < 0.0001$  for all).

|       |   | Rater |      |      |      |
|-------|---|-------|------|------|------|
|       |   | 1     | 2    | 3    | 4    |
| Rater | 1 | 1.00  | 0.57 | 0.67 | 0.64 |
|       | 2 | 0.57  | 1.00 | 0.54 | 0.54 |
|       | 3 | 0.67  | 0.54 | 1.00 | 0.54 |
|       | 4 | 0.64  | 0.54 | 0.54 | 1.00 |
